# Supplementary material
Source: Springer Nature journal article supplement (https://www.springermedizin.de/resource/supplementary/12961_2012_261_MOESM4_ESM.pdf/9571010)

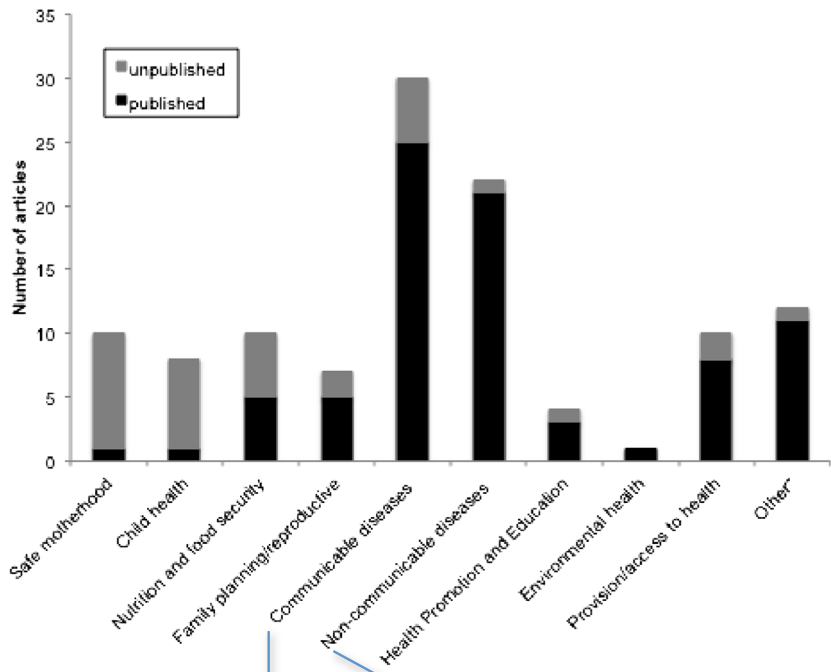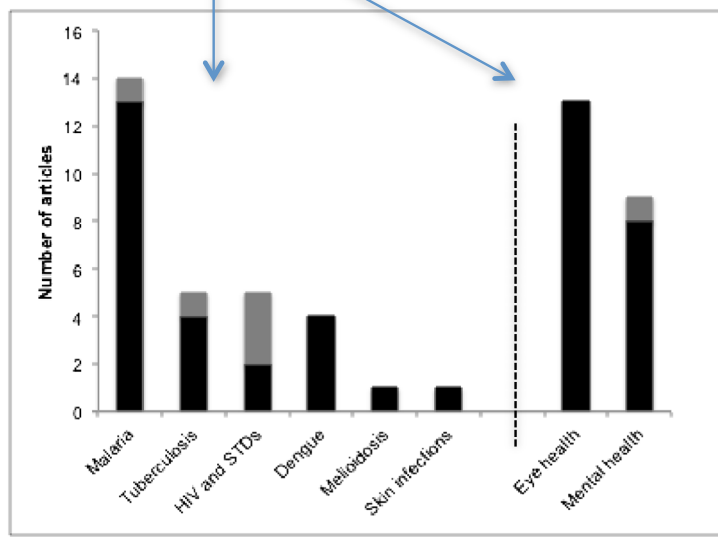

Supplement: MOESM4 [file 9571010]
